# Supplementary material for: Inhibition of Rac1 reduces store overload‐induced calcium release and protects against ventricular arrhythmia
Source: PubMed Central journal article supplement (PMC4956946; doi:10.1111/jcmm.12840), 2016-05-25
Supplement: JCMM-20-1513-s001.pdf [file JCMM-20-1513-s001.pdf]

## **Inhibition of Rac1 reduces store overload-induced calcium release and protects against ventricular arrhythmia**

Lili Zhang, Xiangru Lu, Le Gui, Yan Wu, Stephen Sims, Guoping Wang, Qingping Feng

### **Supplemental videos**

Videos of isolated adult cardiomyocytes were taken using an inverted Nikon Eclipse TE300 phase contrast microscope, and images were captured using Image Master 5 Software (Photon Technology International).

**Supplemental Video 1.** Normal uniform contractions elicited by pacing isolated adult Rac1<sup>f/f</sup> cardiomyocytes. Cardiomyocytes were incubated with Krebs-Ringer-Hepes (KRH) buffer containing 1 mM Ca<sup>2+</sup>. Under control conditions myocytes are quiescent, and uniform contractions are evoked when cell is paced at 0.5 Hz. Video plays at twice actual speed. Width of frame is 270 μm.

**Supplemental Video 2.** Spontaneous waves in isolated adult Rac1<sup>f/f</sup> cardiomyocytes. Cardiomyocytes were incubated with Krebs-Ringer-Hepes (KRH) buffer containing 6 mM Ca<sup>2+</sup> to induce Ca<sup>2+</sup> overload and subsequent spontaneous Ca<sup>2+</sup> release, which gives rise to Ca<sup>2+</sup> waves and waves of contraction. Video plays at twice actual speed. Width of frame is 270 μm.
